# Supplementary material for: An improved North-South synchronization of ice core recordsaround the 41 K beryllium 10 peak
Source: Copernicus journal article supplement (doi:10.5194/cp-2016-79), 2016-07-28

Review of Raisbeck et al. by Christo Buizert

Raisbeck et al. present new high-resolution  $^{10}\text{Be}$  records for several ice cores, which allows for the most precise inter-polar ice core synchronization to date during MIS 3. The authors use this synchronization to (1) estimate the spectral properties of  $^{10}\text{Be}$  variations, (2) investigate the  $\Delta\text{age}/\Delta\text{depth}$  evolution in Antarctic ice cores, and (3) investigate the phasing of the bipolar seesaw. All three problems are very relevant to the ice core and paleoclimate communities, making this paper a valuable contribution. Overall the paper is clear and well written. Even though I disagree with the authors' interpretation of the bipolar seesaw phasing (see below), I fully recommend this work for publication in *Climate of the Past*. Disagreement on the interpretation of data is a normal and healthy part of science, and it does not detract from the main contribution of this work (which is the high-precision  $^{10}\text{Be}$  synchronization).

**We thank Christo Buizert for his comments, particularly the relevance of the paper with regard to phasing of the climate signal. Our replies are given below.**

Comments:

(1) My main concern is the author's interpretation of the bipolar seesaw phasing (section 6). In my experience, it is not meaningful to investigate the phasing of a single AIM event in a single core, because the climatic seesaw signal is overwhelmed by high-frequency  $\delta^{18}\text{O}$  variability due to weather, deposition and other local events. The authors clearly demonstrate this point for AIM 10. However, once the signal from several AIM events is averaged, the shared climatic seesaw signal is clearly revealed. This averaging strategy was used in WAIS Divide project members (2015) – I will refer that paper as WDPM15. To demonstrate this principle, I averaged the  $^{10}\text{Be}$ -synchronized AIM 10 event in the WD, EDML and EDC  $\delta^{18}\text{O}$  time series (see figure R1 below). I synched the EDML record myself using Table 1, and Grant Raisbeck kindly provided the synched high-res EDC record. I did not have access to the VK record. The resulting average is plotted at the bottom of the figure (orange), on top of the WAIS Divide AIM3-18 stack from WDPM15 (purple). It is clear that the multi-core AIM 10 average agrees well with the WDPM15 stack, and shows a clear cooling trend some  $\sim 200$  years after the abrupt DO 10 warming event. The AIM 10 stack is more noisy than the WAIS stack simply because it averages over fewer events.

Landais et al. (2015) and other papers have shown clearly that AIM events are expressed differently at various sites, and I do not dispute that. However, it is also clear that whenever several AIM events are averaged to improve the signal-to-noise ratio, the  $\sim 200$  year time scale shows up (it is also visible in many individual AIM events). This timescale must tell us something about the climatic coupling between the hemispheres. The peak  $\delta^{18}\text{O}$  value for a given AIM event at an individual core site can of course be different from this 200 year lag, due to local high-frequency weather and deposition effects. Interpreting only the position of the  $\delta^{18}\text{O}$ -maximum is therefore too simplistic, in my view.

At EDML the AIM events seem to have a flat top, as opposed to the more triangular shape at e.g. Byrd, WAIS, EDC and TALDICE. However, adding EDML to the multi-core averaging does not seem to alter the fact that there is substantial (Antarctic-wide?!) cooling 200 years after abrupt NH warming (my Fig. R1 below). I request that in a revised MS the authors include a multi-core AIM 10 average (i.e. average of WDC, EDC, EDML and VK) in Fig. 7, and discuss some of the points I made above. I do not think our interpretations are mutually exclusive. On average, there is substantial Antarctic cooling 200 years after NH warming (my preferred interpretation), yet the  $\delta^{18}\text{O}$  isotopic maximum during a single AIM event in a single core can differ substantially from this 200 year delay due to local effects (the authors' interpretation). I trust that the authors are willing to present both interpretations side by side.

I think this will make the bipolar seesaw phasing less confusing to readers (who may be familiar with WDPM15), and make the paper overall more robust.

**It should indeed be noted that we were not disputing in this manuscript the fact that the main cooling in Antarctica followed by almost 200 years the abrupt warming in Greenland. What we want to highlight is the fact that the warming trend in several Antarctic records (EDML and WAIS) is interrupted before the abrupt Greenland temperature increase and thus that there is not one single inflexion point in the Antarctic temperature water isotopic records during the AIM.**

**It thus seems that we agree on the main point which is the cooling. However, we believe that the regional variability during the warming phase should also be highlighted because it also has important implications for the mechanisms and questions the affirmation of “Northern push for bipolar seesaw”. We also feel that before making a stack, we should document the variability from one site to another and from one AIM to another. This is especially important when discussing small phase lags of about 200 years.**

**In the revised version, we will present the stack for the isotope records of the ice cores WDC, EDML and EDC over AIM 10 as suggested, while noting that this is only appropriate if one assumes “a priori” that climate changes simultaneously over all Antarctica. The Vostok isotopic record has not been included in the stack because we could not get a <sup>10</sup>Be synchronization with Match protocol, and unlike EDC and EDML, we do not have the independent evidence from volcanic spikes to support our estimated precision.**

**Two important slope changes can be identified on the stack (either by eye or using one of the routines described in the main text): the first one occurs before the rapid warming in Greenland and the second one occurs after the rapid warming in Greenland. The second breakpoint is indeed coherent with the main cooling in Antarctica occurring 200 years after the rapid warming in Greenland.**

**The revised version will thus describe the regional variability from one core to the other and include a discussion of the stacked record and the two slope changes.**

(2) Section 2 describes the new NGRIP, EDML and VK records in detail, but not EDC. Please add a few lines describing the EDC 10Be record also.

**This was because the EDC record was described in detail in the Raisbeck et al. (2007) paper. We will add a sentence to that effect in the revised version.**

(3) In section 3 the authors test the accuracy of their synchronization. The 10Be also links the EDML and EDC cores, which can be directly compared to the volcanic synchronization of Severi et al 2007. This would provide a true test of the uncertainty in the 10Be synchronization, given that volcanic matching is the gold standard of synchronization. I tried to do this (see Fig. R2), and found a small, but constant offset between the synchronizations which is ~ 70 cm on EDC / ~110 cm on EDML. (I took the Be ties from Table 1, and the volcanic links (on EDC99) from the AICC 2012 documentation). Do you have any idea where this offset could come from? I would urge the authors to double check for trivial mistakes such as converting bag numbers to depths, or similar. Or is this the offset between the EDC96 and EDC99 cores? I could not find any information on which EDC core was used. In either case, the direct comparison to Severi et al. (2007) provides a great

opportunity to test the precision of the  $^{10}\text{Be}$  ties. It may be worth including this comparison as a third panel to Fig. 3.

**The answer to this apparent paradox is very simple. Although the reviewer apparently missed it, our  $^{10}\text{Be}$  depths are indeed those of EDC96, as indicated in Table 1 (although we mistakenly gave as EDC 97). This is because both the volcanic and  $^{10}\text{Be}$  measurements were made in the core labeled as EDC 96. We show below the same plot as the referee, but using EDC 96 depths for both  $^{10}\text{Be}$  and the volcanic peaks of Severi et al. (2007). As can be seen, the agreement is excellent, even less than the 20 years we cite as our estimated precision. There in fact is some disagreement between authors of the present paper whether or not this is a true quantitative test of the uncertainty in our synchronization, as suggested by the reviewer. One of us (JJ) agrees with this argument, and in fact made it many years ago. Another (GMR) argues that in fact it only rigorously proves that our synchronization procedure independently aligns any chosen feature in NGRIP with a common  $^{10}\text{Be}$  peak in EDC and EDML (we must remember that EDML was dated using common volcanic peaks found in EDC, and thus any feature found in one must almost by construction be found at the correct depth in the other). While it is highly likely that the  $^{10}\text{Be}$  peaks chosen in NGRIP correspond to those found in the Antarctic cores, there is no independent proof that this is the case. For example, let us consider a case where an anomalous peak in NGRIP is synchronized with a real  $^{10}\text{Be}$  peak in EDC. It will then, for the reason given above, also synchronize with high precision the same  $^{10}\text{Be}$  peak in EDML. While, as stated above, this example is unlikely, a more plausible possibility is that for some reason (higher accumulation, higher resolution sampling) the form of the  $^{10}\text{Be}$  peaks is different in NGRIP than in EDC/EDML. In that case, it is possible that our synchronization protocol will align a different part of the peak at NGRIP with that in EDC/EDML. If the  $^{10}\text{Be}$  peaks are due to solar minima, such as the Maunder Minimum, as we believe, they have durations of the order of 100 years. Thus, the above effect could lead to an offset of several decades between NGRIP and EDC/EDML, while still maintaining a tight correlation between EDC and EDML. In fact, this may be at least part of the explanation for one of the observations discussed in the paper, which is that there appears to be an offset corresponding to  $27 \pm 7$  years between the observed depth in EDC/EDML for the NGRIP volcanic peaks L2 and L3 of Svensson et al. (2013), compared to the predicted depth using the  $^{10}\text{Be}$  synchronization.**

(4) In section 5 I am confused by the different trends in the  $\Delta\text{age}$  and  $\Delta\text{depth}$ . In my mind the two are exchangeable, as you can calculate one from the other using the ice chronology. For example, how is it possible that the EDC  $\Delta\text{age}$  for AICC2012 and Scen4 (red and black) are identical, while their  $\Delta\text{depth}$  is so different? Doesn't that imply that these two chronologies have completely different annual layer thickness (while both are synched via  $^{10}\text{Be}$ )? The authors could provide a few more details on how the  $\Delta\text{age}$  and  $\Delta\text{depth}$  are constructed, which may help in understanding what's going on. For example, which chronology is used for the 2 Louergue scenarios? I would assume the authors ran the densification models using the AICC2012 T, Acc and chronology for consistency?

**The EDC3 (scenario 1 and 4) and AICC2012  $\Delta\text{age}$  and  $\Delta\text{depth}$  were directly taken from the official chronologies given respectively by Louergue et al. (2007) for EDC3 (data available as supplementary material of this paper) and Bazin et al. (2013) and Veres et al. (2013) for AICC2012 (data available as supplementary material of this paper).**

For each tie points on the depth scale, we took the  $\Delta$ age from the corresponding depth level directly from the published chronologies. Then, using the ice age corresponding to the depth level d1, we look at the depth d2 when the gas age at d2 equals the ice age at d1 on each chronology.

In the revised version, we will add some sentences to explain these figures.

(5) In section 6 (P7 L25-27) the authors use the BREAKFIT routine and a MATLAB routine to estimate the breakpoint in the data. I don't think these routines are particularly fit for the problem at hand, given that the time series are short and very noisy. The data range must be picked to isolate AIM 10, and then the routines require the user to specify a range where they believe the breakpoint is located. Because it is short and noisy, these subjective choices seem to matter a lot for AIM 10. For example, I tried the fitting routine for just AIM 10 at WAIS (where I did this before), and got a timing of -10 or +205 years depending on whether I used linear or 2nd order fitting. I don't mean to suggest that the authors applied the code incorrectly, I simply want to highlight that for this particular problem the outcome is very sensitive to the subjective choices of the operator. The authors may have had the same experience.

For longer time series with less noise the routines perform well, and become independent of the subjective choices of the user.

The isotopic maxima that the authors identify in Fig. 7 can also be picked out by eye, so I suggest the authors just remove the fitting routines from the paper (my preference) or provide more details on how the fitting routines were applied (data range, etc) and how the uncertainties were estimated.

Indeed, we have to specify a range for the detection of the breakpoint in the breakfit and matlab routines. In the previous manuscript, the chosen approach with the breakfit software was hence to have a ~500 year window moving between 42200 ka and 40500 ka and we took the first significant breakpoint. With the matlab routine, we chose first a 20-year window moving between +200 years and -200 years around the DO10 Greenland warming to determine the first breakpoint value. Then a 2-year window moving between  $\pm 100$  years around this first breakpoint is applied for the 2<sup>nd</sup> order polynomial curve fitting. The breakpoint value for the WDC isotopic curve is quite sensitive to this second step and we find a value between 150 and 210 years before the mid-slope of the warming in NGRIP (a value of 250 years can be obtained but the fit is not coherent). It is indeed correct that a determination can also be made by eye and actually the breakfit and matlab routines are used to check if the breakpoint identified by eye is indeed statistically significant. Our aim in using such an approach was also to follow the same approach as in the WAIS community paper (2015).

Minor/language:

Throughout the text: I would suggest replacing "delta age" and "delta depth" with  $\Delta$ age and  $\Delta$ depth (i.e.using Greek Delta symbol) to confirm with common usage in the ice core literature. **Will do**

Throughout: WAIS Divide is spelled without a hyphen between “WAIS” and “Divide”

**Will do**

Title: “41 k” should probably be changed to “41 kyr/ka”. Also, please include a hyphen in “beryllium-10”. **Will do**

P1 L9: are these 2sigma uncertainty values?

**This estimate is a compromise between (1) the standard deviation (4+/-3 years) between EDC and EDML based on the independent 10Be synchronization with NGRIP, compared to the direct synchronization of Severi et al. (2007) as shown in the revised Fig shown below and (2) that (27+/-7 years) observed between the observed position of the presumed bipolar volcanic peaks L2 and L3 of Svensson et al. (2013) in EDC and EDML compared to their predicted position using the 10Be synchronization. As such it really does not have any 1 or 2 sigma meaning.**

P1 L 20: Remove “our”. The author lists of Raisbeck et al. 2007 and Raisbeck et al. 2016 are not identical. **Will do**

P1 L 21: ... estimates of the DEPTH difference between ... **Will do**

P1 L25: In a previous study, Raisbeck et al. (2007) have .... (same reason as above) **Will do**

Section 3: Please specify confidence intervals for the uncertainty estimates. Are these 2 sigma?

**Same answer as above**

Section 3: Maybe note that the precision on the WAIS Divide CH4 inter polar synchronization at 40ka is estimated to be +/- 73 years (2 sigma uncertainty in  $\Delta$ age; see Buizert et al. 2015 Fig. 3e), and therefore the new 10Be synchro is more precise. **Will do**

P5 L12-14: Do you mean meteorology interferes with the actual atmospheric 10Be production rate, **No** or do you mean it leads to differences in deposition, transport and dilution? **Yes**  
Because of the annual layer count, Greenland Acc can be reconstructed much more accurately than Antarctic Acc – could this be one of the reasons the 200yr peak is better resolved at NGRIP?

**Possibly, but not obvious, since counted layers must be translated into surface accumulation using a thinning model, which at this depth involves multiplying by about a factor of 5, and might depend on temperature, for example between stadial and interstadial.**

P7 L21-22: I think it would be good to cite e.g. Blunier and Brook 2001 here, who were among the first to describe the asynchronous coupling clearly. **Will do**

Figs 7 and 8, caption: please specify how the WD2014 chronology was transferred to GICC05. I assume you divided by 1.0063 and then added 50 years to get from BP1950 to B2k?

**Yes, we follow this conversion described in Buizert et al. (2015) as cited in the captions of Figs 7 and 8.**

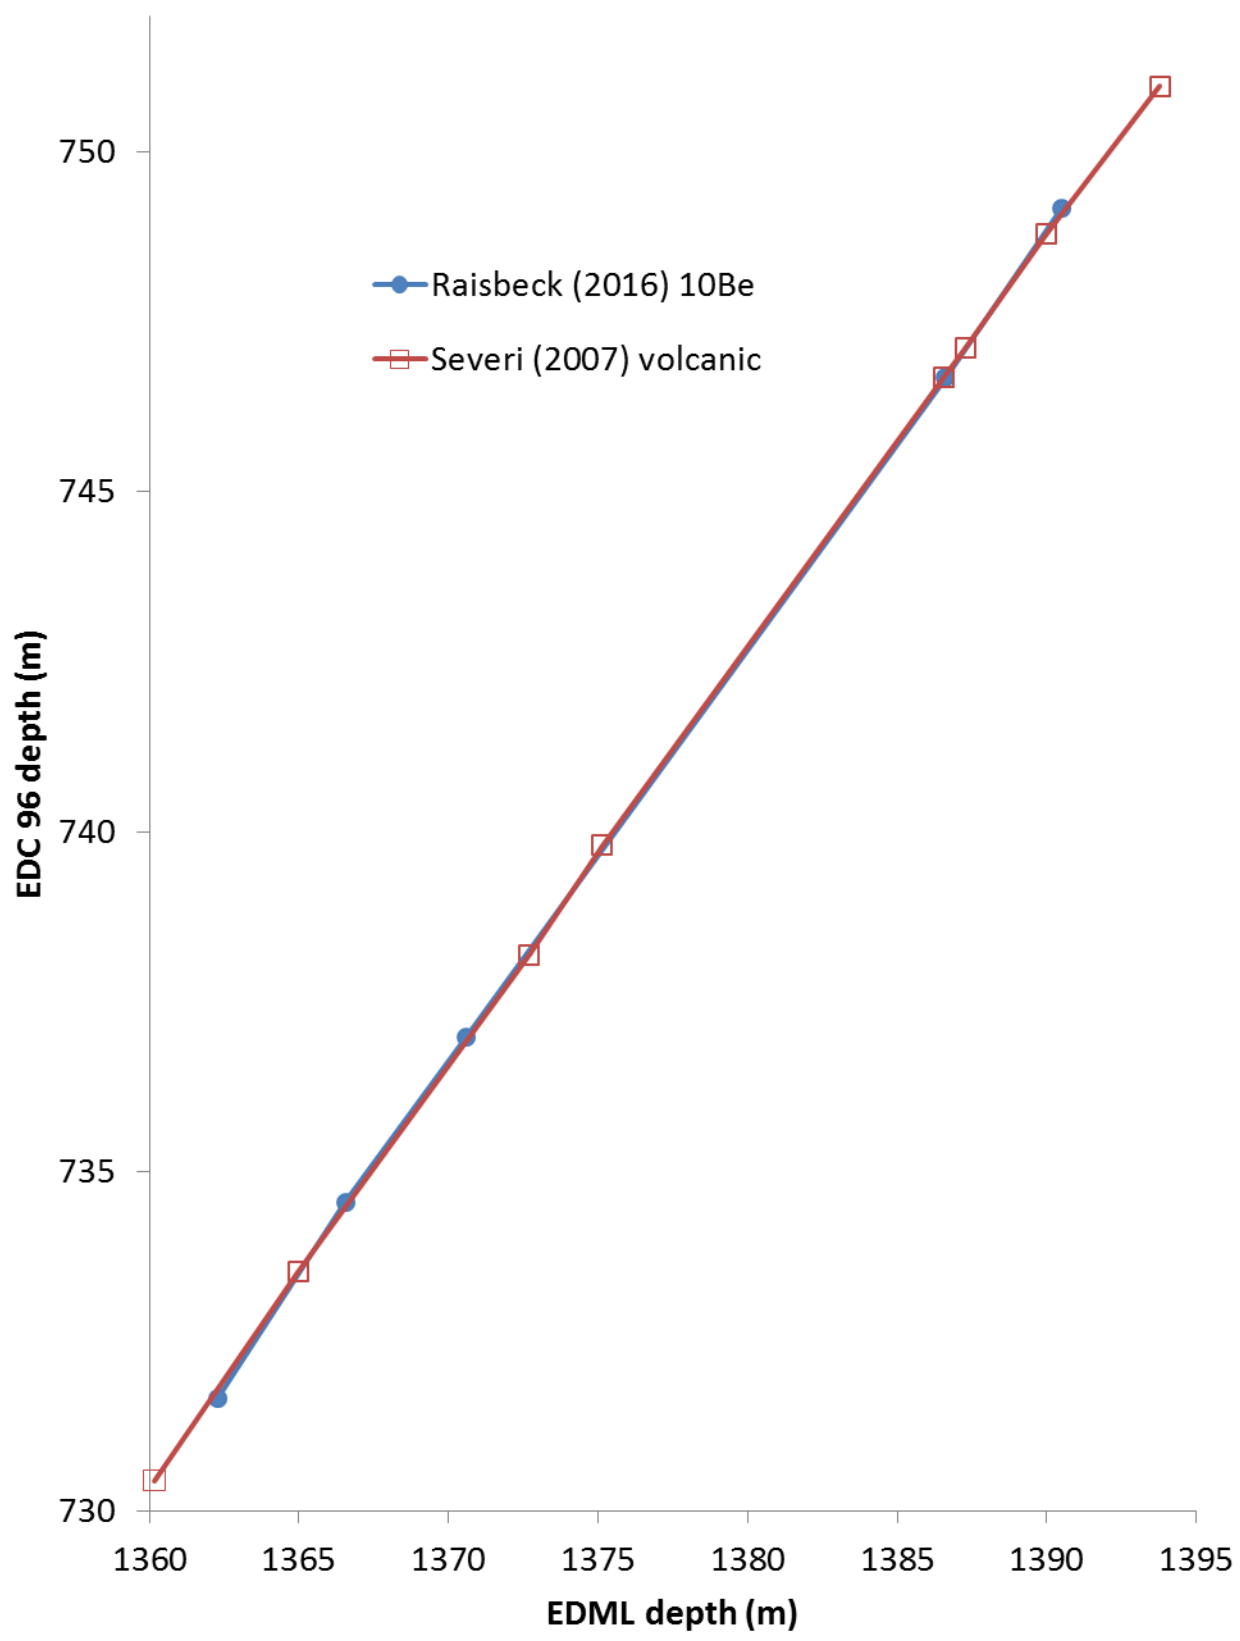

Supplement: Supplementary file [file cp-2016-79-AC1-supplement.pdf]
